# Supplementary material
Source: PubMed Central journal article supplement (PMC1446981)
Supplement: jbacter_188_8_2875__1.pdf [file jbacter_188_8_2875__1.pdf]

|               |                                                   |     |            |       |       |       |           |       |       |       |           |       |       |       |  |  |  |  |
|---------------|---------------------------------------------------|-----|------------|-------|-------|-------|-----------|-------|-------|-------|-----------|-------|-------|-------|--|--|--|--|
| <b>EF1091</b> | <b>hypothetical protein</b>                       | 500 | <b>-5</b>  | 0.012 | 25172 | 34779 |           |       |       |       |           |       |       |       |  |  |  |  |
| <b>EF1092</b> | <b>conserved hypothetical protein</b>             | 500 | <b>-4</b>  | 0.011 | 16027 | 21743 |           |       |       |       |           |       |       |       |  |  |  |  |
| <b>EF1093</b> | <b>LPX-motif cell wall anchor domain protein</b>  | 496 | <b>-4</b>  | 0.005 | 24900 | 34987 | <b>-3</b> | 0.031 | 11832 | 17431 |           |       |       |       |  |  |  |  |
| <b>EF1094</b> | <b>LPX-site transpeptidase family protein</b>     | 488 | <b>-2</b>  | 0.019 | 9484  | 13402 |           |       |       |       |           |       |       |       |  |  |  |  |
| <b>EF1097</b> | <b>hypothetical protein</b>                       | 466 | <b>214</b> | 0.004 | 14581 | 316   | <b>10</b> | 0.050 | 4338  | 516   |           |       |       |       |  |  |  |  |
| EF1106        | hypothetical protein                              | 100 | <b>2</b>   | 0.016 | 3129  | 3034  |           |       |       |       |           |       |       |       |  |  |  |  |
| EF1108        | conserved hypothetical protein                    | 499 | <b>-2</b>  | 0.015 | 9248  | 12279 |           |       |       |       |           |       |       |       |  |  |  |  |
| EF1120        | amino acid ABC transporter, P-binding protein     | 507 |            |       |       |       | <b>4</b>  | 0.034 | 6986  | 2259  |           |       |       |       |  |  |  |  |
| EF1152        | conserved hypothetical protein                    | 498 |            |       |       |       |           |       |       |       | <b>2</b>  | 0.030 | 6284  | 3321  |  |  |  |  |
| EF1153        | carboxypeptidase                                  | 500 |            |       |       |       | <b>2</b>  | 0.015 | 14854 | 8725  | <b>2</b>  | 0.000 | 11492 | 6884  |  |  |  |  |
| EF1154        | conserved hypothetical protein                    | 500 |            |       |       |       | <b>4</b>  | 0.026 | 13692 | 7026  | <b>2</b>  | 0.022 | 9108  | 5104  |  |  |  |  |
| EF1155        | endonuclease III                                  | 497 | <b>2</b>   | 0.007 | 17009 | 9858  | <b>3</b>  | 0.005 | 13673 | 6373  |           |       |       |       |  |  |  |  |
| EF1160        | PTS system component                              | 500 |            |       |       |       |           |       |       |       | <b>-2</b> | 0.045 | 2482  | 1871  |  |  |  |  |
| EF1167        | fructose-bisphosphate aldolase                    | 486 |            |       |       |       | <b>-3</b> | 0.006 | 8733  | 15841 |           |       |       |       |  |  |  |  |
| EF1189        | hypothetical protein                              | 515 |            |       |       |       | <b>2</b>  | 0.041 | 4505  | 2852  |           |       |       |       |  |  |  |  |
| EF1190        | hypothetical protein                              | 469 | <b>3</b>   | 0.000 | 27580 | 13454 |           |       |       |       |           |       |       |       |  |  |  |  |
| EF1191        | DegV family protein                               | 496 | <b>3</b>   | 0.010 | 30212 | 12243 | <b>3</b>  | 0.048 | 6383  | 3262  | <b>2</b>  | 0.026 | 3430  | 1787  |  |  |  |  |
| EF1206        | malate oxidoreductase                             | 500 | <b>-2</b>  | 0.016 | 8167  | 10520 | <b>-5</b> | 0.003 | 12551 | 35780 |           |       |       |       |  |  |  |  |
| EF1207        | citrate carrier protein                           | 504 |            |       |       |       | <b>-2</b> | 0.013 | 5629  | 7391  |           |       |       |       |  |  |  |  |
| EF1213        | acetolactate synthase                             | 501 | <b>-2</b>  | 0.010 | 14831 | 19082 |           |       |       |       |           |       |       |       |  |  |  |  |
| EF1219        | spermidine/putrescine ABC transporter, permea     | 500 |            |       |       |       | <b>2</b>  | 0.004 | 2329  | 1556  |           |       |       |       |  |  |  |  |
| EF1228        | hypothetical protein                              | 503 | <b>-2</b>  | 0.004 | 8950  | 13499 |           |       |       |       |           |       |       |       |  |  |  |  |
| EF1229        | conserved hypothetical protein                    | 490 | <b>-2</b>  | 0.007 | 4375  | 6388  |           |       |       |       |           |       |       |       |  |  |  |  |
| EF1254        | ABC transporter, permease protein                 | 508 | <b>2</b>   | 0.007 | 2269  | 1471  |           |       |       |       |           |       |       |       |  |  |  |  |
| EF1255        | ABC transporter, P-binding protein                | 515 | <b>2</b>   | 0.011 | 4225  | 2710  |           |       |       |       |           |       |       |       |  |  |  |  |
| EF1256        | membrane protein, putative                        | 410 |            |       |       |       | <b>2</b>  | 0.009 | 5419  | 3027  |           |       |       |       |  |  |  |  |
| EF1271        | N utilization substance protein A                 | 497 |            |       |       |       | <b>3</b>  | 0.005 | 4035  | 1789  |           |       |       |       |  |  |  |  |
| EF1274        | translation initiation factor IF-2                | 500 |            |       |       |       | <b>2</b>  | 0.004 | 27445 | 14496 |           |       |       |       |  |  |  |  |
| EF1300        | cell division protein, FtsW/RodA/SpovE family     | 501 | <b>-2</b>  | 0.001 | 4860  | 7110  |           |       |       |       |           |       |       |       |  |  |  |  |
| EF1306        | heat-inducible transcription repressor HrcA       | 512 |            |       |       |       | <b>2</b>  | 0.000 | 24776 | 15891 |           |       |       |       |  |  |  |  |
| EF1307        | heat shock protein GrpE                           | 481 |            |       |       |       | <b>2</b>  | 0.001 | 27789 | 16407 |           |       |       |       |  |  |  |  |
| EF1308        | dnak protein                                      | 501 |            |       |       |       | <b>2</b>  | 0.000 | 24684 | 13369 |           |       |       |       |  |  |  |  |
| EF1310        | dnaJ protein                                      | 505 |            |       |       |       | <b>2</b>  | 0.012 | 10101 | 5293  |           |       |       |       |  |  |  |  |
| EF1322        | conserved hypothetical protein                    | 508 |            |       |       |       | <b>2</b>  | 0.007 | 22665 | 14053 | <b>2</b>  | 0.023 | 22751 | 13106 |  |  |  |  |
| EF1323        | conserved hypothetical protein, authentic point n | 497 |            |       |       |       | <b>2</b>  | 0.007 | 30289 | 16311 | <b>3</b>  | 0.032 | 25141 | 13283 |  |  |  |  |
| EF1327        | (R)-2-hydroxyglutaryl-CoA dehydratase activator   | 501 | <b>-3</b>  | 0.006 | 16697 | 25332 | <b>-2</b> | 0.021 | 4347  | 5967  |           |       |       |       |  |  |  |  |
| EF1343        | maltose ABC transporter, permease protein, put    | 494 |            |       |       |       | <b>6</b>  | 0.002 | 7052  | 2050  | <b>4</b>  | 0.033 | 4477  | 1968  |  |  |  |  |
| EF1344        | maltose ABC transporter, permease protein         | 498 |            |       |       |       | <b>4</b>  | 0.025 | 4691  | 1901  |           |       |       |       |  |  |  |  |
| EF1345        | maltose ABC transporter, maltose-binding protei   | 502 |            |       |       |       | <b>4</b>  | 0.007 | 26745 | 13095 | <b>5</b>  | 0.004 | 27207 | 8869  |  |  |  |  |
| EF1352        | cation-transporting Pase, E1-E2 family            | 496 |            |       |       |       | <b>2</b>  | 0.000 | 7348  | 3514  |           |       |       |       |  |  |  |  |
| EF1353        | pyruvate dehydrogenase complex, E1 component      | 493 |            |       |       |       | <b>2</b>  | 0.044 | 37222 | 29195 |           |       |       |       |  |  |  |  |
| EF1376        | hypothetical protein                              | 496 | <b>3</b>   | 0.007 | 19261 | 9070  |           |       |       |       |           |       |       |       |  |  |  |  |
| EF1404        | MutS2 family protein                              | 501 |            |       |       |       |           |       |       |       | <b>3</b>  | 0.031 | 2837  | 1338  |  |  |  |  |
| EF1450        | conserved hypothetical protein                    | 474 |            |       |       |       | <b>2</b>  | 0.004 | 5724  | 3258  |           |       |       |       |  |  |  |  |
| EF1451        | hypothetical protein                              | 219 |            |       |       |       | <b>2</b>  | 0.017 | 2690  | 1788  |           |       |       |       |  |  |  |  |
| EF1494        | V-type Pase, subunit K                            | 391 |            |       |       |       | <b>2</b>  | 0.032 | 6369  | 4093  |           |       |       |       |  |  |  |  |
| EF1496        | V-type Pase, subunit C                            | 488 |            |       |       |       | <b>2</b>  | 0.000 | 15182 | 8176  |           |       |       |       |  |  |  |  |
| EF1497        | V-type Pase, subunit G                            | 285 |            |       |       |       | <b>2</b>  | 0.008 | 7057  | 3608  |           |       |       |       |  |  |  |  |
| EF1498        | V-type Pase, subunit A                            | 500 |            |       |       |       | <b>2</b>  | 0.005 | 9796  | 5697  |           |       |       |       |  |  |  |  |
| EF1499        | V-type Pase, subunit B                            | 499 |            |       |       |       | <b>2</b>  | 0.003 | 11783 | 6427  | <b>2</b>  | 0.021 | 8010  | 5113  |  |  |  |  |
| EF1500        | V-type Pase, subunit D                            | 489 |            |       |       |       | <b>3</b>  | 0.002 | 9180  | 3941  |           |       |       |       |  |  |  |  |
| EF1501        | hypothetical protein                              | 261 | <b>2</b>   | 0.018 | 10842 | 6088  | <b>4</b>  | 0.015 | 10459 | 6171  |           |       |       |       |  |  |  |  |
| EF1515        | transcription antiterminator BglG family protein  | 515 | <b>3</b>   | 0.000 | 8264  | 4197  |           |       |       |       |           |       |       |       |  |  |  |  |
| EF1516        | PTS system component                              | 496 | <b>3</b>   | 0.000 | 7494  | 3168  |           |       |       |       |           |       |       |       |  |  |  |  |
| EF1521        | DNA primase                                       | 500 |            |       |       |       | <b>3</b>  | 0.025 | 9520  | 5105  |           |       |       |       |  |  |  |  |
| EF1522        | RNA polymerase sigma-70 factor family protein     | 501 |            |       |       |       | <b>3</b>  | 0.014 | 8120  | 3997  |           |       |       |       |  |  |  |  |
| EF1524        | conserved hypothetical protein                    | 488 |            |       |       |       | <b>2</b>  | 0.001 | 4211  | 2194  |           |       |       |       |  |  |  |  |
| EF1525        | ferric uptake regulator family protein            | 420 |            |       |       |       | <b>2</b>  | 0.021 | 8694  | 4587  |           |       |       |       |  |  |  |  |
| EF1526        | glyceraldehyde 3-phosphate dehydrogenase          | 503 |            |       |       |       | <b>2</b>  | 0.041 | 38442 | 27021 |           |       |       |       |  |  |  |  |
| EF1535        | conserved hypothetical protein                    | 497 |            |       |       |       | <b>-2</b> | 0.036 | 2078  | 3419  |           |       |       |       |  |  |  |  |
| EF1541        | conserved hypothetical protein                    | 494 | <b>2</b>   | 0.004 | 5006  | 3021  | <b>4</b>  | 0.002 | 11618 | 4040  | <b>3</b>  | 0.035 | 9407  | 3569  |  |  |  |  |
| EF1547        | cytidylate kinase                                 | 500 | <b>3</b>   | 0.002 | 29817 | 15920 |           |       |       |       | <b>4</b>  | 0.021 | 5864  | 1815  |  |  |  |  |
| <b>EF1561</b> | <b>shikimate 5-dehydrogenase</b>                  | 500 |            |       |       |       | <b>5</b>  | 0.016 | 12050 | 3784  | <b>9</b>  | 0.036 | 10293 | 1662  |  |  |  |  |
| <b>EF1562</b> | <b>phospho-2-dehydro-3-deoxyheptonate aldola</b>  | 500 | <b>2</b>   | 0.032 | 38475 | 24865 | <b>17</b> | 0.016 | 42955 | 8977  | <b>24</b> | 0.010 | 38317 | 3812  |  |  |  |  |
| <b>EF1563</b> | <b>3-dehydroquinase synthase</b>                  | 500 | <b>3</b>   | 0.008 | 16010 | 7890  | <b>24</b> | 0.015 | 28577 | 4925  | <b>22</b> | 0.004 | 26175 | 2381  |  |  |  |  |
| <b>EF1564</b> | <b>chorismate synthase</b>                        | 503 | <b>2</b>   | 0.038 | 8740  | 4646  | <b>21</b> | 0.020 | 14845 | 2774  | <b>9</b>  | 0.006 | 10042 | 1669  |  |  |  |  |
| <b>EF1565</b> | <b>prephenate dehydrogenase, putative</b>         | 487 | <b>2</b>   | 0.034 | 19796 | 12862 | <b>11</b> | 0.015 | 40961 | 11835 | <b>13</b> | 0.008 | 30625 | 5187  |  |  |  |  |

|        |                                                 |     |     |       |       |       |      |       |       |       |     |       |       |       |
|--------|-------------------------------------------------|-----|-----|-------|-------|-------|------|-------|-------|-------|-----|-------|-------|-------|
| EF1566 | 3-phosphoshikimate 1-carboxyvinyltransferase    | 495 |     |       |       |       | 11   | 0.007 | 34102 | 8180  | 11  | 0.012 | 21811 | 4521  |
| EF1567 | shikimate kinase                                | 444 |     |       |       |       | 4    | 0.012 | 33649 | 11644 | 8   | 0.023 | 30830 | 6805  |
| EF1568 | chorismate mutase/prephenate dehydratase,       | 496 |     |       |       |       | 10   | 0.010 | 18571 | 4222  |     |       |       |       |
| EF1569 | transcriptional regulator, PSR protein          | 499 |     |       |       |       | 5    | 0.024 | 4772  | 1871  |     |       |       |       |
| EF1573 | hypothetical protein                            | 212 |     |       |       |       | 2    | 0.043 | 4339  | 2474  |     |       |       |       |
| EF1574 | Na <sup>+</sup> /H <sup>+</sup> antiporter      | 500 |     |       |       |       | 2    | 0.003 | 6411  | 2977  |     |       |       |       |
| EF1586 | NADH oxidase                                    | 501 |     |       |       |       | 2    | 0.007 | 21185 | 12763 |     |       |       |       |
| EF1590 | protease synthase and sporulation negative regu | 477 |     |       |       |       | 3    | 0.006 | 2842  | 1250  |     |       |       |       |
| EF1596 | conserved domain protein                        | 497 |     |       |       |       |      |       |       |       | 2   | 0.014 | 4326  | 2362  |
| EF1606 | glycosyl hydrolase, family 1                    | 499 | 4   | 0.016 | 4500  | 2061  | 4    | 0.012 | 2234  | 1043  |     |       |       |       |
| EF1610 | hypothetical protein                            | 503 | 3   | 0.000 | 17958 | 9569  |      |       |       |       |     |       |       |       |
| EF1616 | conserved hypothetical protein                  | 372 |     |       |       |       |      |       |       |       | -2  | 0.013 | 2156  | 2843  |
| EF1617 | conserved hypothetical protein                  | 416 |     |       |       |       | -87  | 0.001 | 1862  | 23224 | -49 | 0.002 | 1081  | 15457 |
| EF1618 | ethanolamine utilization protein euth           | 494 |     |       |       |       | -63  | 0.000 | 870   | 10659 | -32 | 0.006 | 812   | 7251  |
| EF1619 | carbon dioxide concentrating mechanism pro      | 241 |     |       |       |       | -51  | 0.005 | 689   | 13721 | -59 | 0.006 | 474   | 9739  |
| EF1620 | hypothetical protein                            | 505 |     |       |       |       | -95  | 0.003 | 660   | 17922 | -63 | 0.012 | 821   | 18735 |
| EF1621 | conserved hypothetical protein                  | 504 |     |       |       |       | -96  | 0.004 | 997   | 24108 | -92 | 0.008 | 691   | 13663 |
| EF1622 | hypothetical protein                            | 501 |     |       |       |       | -181 | 0.000 | 834   | 23003 | -45 | 0.027 | 619   | 13530 |
| EF1623 | pduJ protein                                    | 266 |     |       |       |       | -61  | 0.000 | 1207  | 18665 | -45 | 0.003 | 577   | 9812  |
| EF1624 | aldehyde dehydrogenase, putative                | 506 |     |       |       |       | -165 | 0.000 | 1331  | 29369 | -77 | 0.011 | 1164  | 18215 |
| EF1625 | pduJ protein                                    | 506 |     |       |       |       | -8   | 0.002 | 889   | 2712  | -6  | 0.007 | 1126  | 2038  |
| EF1627 | ethanolamine ammonia-lyase light chain, put     | 487 |     |       |       |       | -139 | 0.001 | 913   | 24156 | -77 | 0.029 | 824   | 10588 |
| EF1629 | ethanolamine ammonia lyase large subunit        | 495 |     |       |       |       | -288 | 0.000 | 792   | 26871 | -86 | 0.005 | 612   | 14231 |
| EF1630 | chaperonin, putative, authentic frameshift      | 500 |     |       |       |       | -107 | 0.001 | 932   | 15614 | -43 | 0.000 | 779   | 10203 |
| EF1632 | histidine kinase, putative                      | 503 |     |       |       |       | -18  | 0.011 | 799   | 7581  | -12 | 0.008 | 1793  | 7958  |
| EF1633 | response regulator                              | 440 |     |       |       |       | -24  | 0.010 | 1719  | 19525 | -21 | 0.004 | 1200  | 9535  |
| EF1634 | propanediol utilization protein PduV            | 299 |     |       |       |       | -85  | 0.001 | 1550  | 24497 | -27 | 0.003 | 1325  | 8307  |
| EF1635 | alcohol dehydrogenase, iron-containing          | 500 |     |       |       |       | -18  | 0.002 | 2433  | 6382  | -7  | 0.015 | 823   | 2028  |
| EF1637 | conserved hypothetical protein                  | 502 |     |       |       |       | -9   | 0.011 | 817   | 4064  |     |       |       |       |
| EF1638 | propanediol utilization protein PduV            | 424 |     |       |       |       | -22  | 0.003 | 631   | 4642  |     |       |       |       |
| EF1639 | siderophore ABC transporter, P-binding prot     | 499 |     |       |       |       | -3   | 0.010 | 2202  | 2473  |     |       |       |       |
| EF1640 | hemin ABC transporter, permease protein, pi     | 500 |     |       |       |       | -4   | 0.048 | 3023  | 4326  |     |       |       |       |
| EF1641 | hemin ABC transporter, hemin-binding prote      | 496 |     |       |       |       | -4   | 0.008 | 2746  | 4801  | -2  | 0.016 | 1733  | 2386  |
| EF1655 | 2-dehydropantoate 2-reductase, putative         | 502 |     |       |       |       |      |       |       |       | -6  | 0.034 | 930   | 5366  |
| EF1658 | branched-chain alpha-keto acid, E2 compone      | 502 |     |       |       |       | -5   | 0.010 | 8857  | 21970 |     |       |       |       |
| EF1659 | branched-chain alpha-keto acid dehydrogenase    | 502 |     |       |       |       | -7   | 0.000 | 8051  | 25402 | -8  | 0.005 | 4334  | 22514 |
| EF1660 | branched-chain alpha-keto acid dehydrogenase    | 506 |     |       |       |       | -8   | 0.000 | 6597  | 21725 | -11 | 0.024 | 3205  | 20934 |
| EF1661 | branched-chain alpha-keto acid dehydrogenase    | 495 |     |       |       |       | -6   | 0.023 | 3825  | 14197 |     |       |       |       |
| EF1662 | branched-chain carboxylic acid kinase           | 498 |     |       |       |       | -11  | 0.000 | 4200  | 19731 |     |       |       |       |
| EF1663 | branched-chain phosphotransacylase              | 500 |     |       |       |       | -6   | 0.011 | 4241  | 14199 | -6  | 0.029 | 2633  | 10899 |
| EF1679 | tail-specific protease, putative                | 502 |     |       |       |       |      |       |       |       | 3   | 0.022 | 5894  | 2847  |
| EF1680 | conserved hypothetical protein                  | 502 |     |       |       |       |      |       |       |       | 3   | 0.018 | 3644  | 1772  |
| EF1681 | peptide methionine sulfoxide reductase          | 443 | 2   | 0.000 | 15123 | 8276  | 5    | 0.018 | 12283 | 4618  |     |       |       |       |
| EF1682 | conserved hypothetical protein                  | 499 | 2   | 0.002 | 20168 | 11755 | 12   | 0.014 | 10880 | 2449  | 8   | 0.010 | 6683  | 1503  |
| EF1683 | Lipase/Acylhydrolase, putative                  | 495 | 3   | 0.002 | 11328 | 6079  | 13   | 0.019 | 8448  | 1997  | 5   | 0.043 | 4185  | 1187  |
| EF1700 | signal recognition particle protein             | 500 |     |       |       |       |      |       |       |       | 2   | 0.008 | 39945 | 27054 |
| EF1701 | conserved hypothetical protein                  | 271 |     |       |       |       | 2    | 0.042 | 2151  | 1344  |     |       |       |       |
| EF1702 | conserved hypothetical protein                  | 431 |     |       |       |       | 2    | 0.027 | 10622 | 6208  | 3   | 0.003 | 9633  | 4828  |
| EF1707 | conserved hypothetical protein                  | 500 |     |       |       |       | -8   | 0.009 | 17735 | 45924 | -14 | 0.009 | 12097 | 51906 |
| EF1708 | conserved hypothetical protein                  | 497 |     |       |       |       | -9   | 0.003 | 15399 | 50360 | -11 | 0.012 | 9367  | 42145 |
| EF1712 | orotate phosphoribosyltransferase               | 492 |     |       |       |       | 3    | 0.013 | 4479  | 2002  |     |       |       |       |
| EF1714 | dihydroorotate dehydrogenase                    | 505 |     |       |       |       | 2    | 0.014 | 4486  | 2250  |     |       |       |       |
| EF1719 | aspartate carbamoyltransferase                  | 512 | -2  | 0.043 | 9302  | 13045 |      |       |       |       |     |       |       |       |
| EF1720 | uracil permease                                 | 512 | -2  | 0.022 | 6975  | 10049 |      |       |       |       |     |       |       |       |
| EF1727 | pore forming protein ebsa                       | 412 | 2   | 0.004 | 2561  | 1655  |      |       |       |       |     |       |       |       |
| EF1732 | ABC transporter, P-binding/permease protein     | 503 | 3   | 0.008 | 9530  | 4399  |      |       |       |       |     |       |       |       |
| EF1733 | ABC transporter, P-binding/permease protein     | 503 | 2   | 0.010 | 8303  | 4138  |      |       |       |       |     |       |       |       |
| EF1753 | conserved hypothetical protein                  | 488 | -3  | 0.007 | 9113  | 17209 |      |       |       |       |     |       |       |       |
| EF1760 | cell division protein FtsX, putative            | 501 |     |       |       |       | 2    | 0.001 | 9577  | 5017  |     |       |       |       |
| EF1761 | cell division P-binding protein FtsE            | 499 |     |       |       |       | 2    | 0.016 | 11124 | 5770  |     |       |       |       |
| EF1762 | peptide chain release factor 2                  | 507 |     |       |       |       | 4    | 0.007 | 14261 | 4855  | 3   | 0.021 | 6852  | 4062  |
| EF1770 | hypothetical protein                            | 161 |     |       |       |       |      |       |       |       | 3   | 0.045 | 3641  | 1845  |
| EF1774 | conserved hypothetical protein                  | 490 |     |       |       |       | 2    | 0.033 | 2321  | 1250  |     |       |       |       |
| EF1803 | PTS system component                            | 500 |     |       |       |       |      |       |       |       | -2  | 0.002 | 1560  | 3118  |
| EF1817 | serine proteinase homolog                       | 501 | 503 | 0.001 | 47004 | 1356  | 549  | 0.000 | 37583 | 958   | 166 | 0.015 | 35003 | 4701  |
| EF1818 | gelatinase                                      | 506 | 725 | 0.000 | 36622 | 725   | 165  | 0.002 | 17877 | 457   | 215 | 0.031 | 22598 | 1151  |

|                                                                     |     |            |       |       |       |            |       |       |       |            |       |       |       |
|---------------------------------------------------------------------|-----|------------|-------|-------|-------|------------|-------|-------|-------|------------|-------|-------|-------|
| <b>EF1820 AgrCfs</b>                                                | 494 | <b>44</b>  | 0.000 | 31041 | 3092  | <b>228</b> | 0.000 | 14704 | 474   | <b>33</b>  | 0.034 | 6249  | 634   |
| <b>EF1821 agrBfs protein</b>                                        | 500 | <b>480</b> | 0.001 | 42845 | 3793  | <b>153</b> | 0.007 | 20531 | 737   | <b>118</b> | 0.016 | 13257 | 495   |
| EF1826 alcohol dehydrogenase, zinc-containing                       | 499 |            |       |       |       | <b>-2</b>  | 0.012 | 2977  | 4043  |            |       |       |       |
| EF1898 ribosomal protein L19                                        | 273 |            |       |       |       |            |       |       |       | <b>-2</b>  | 0.040 | 5524  | 8824  |
| EF1900 16S rRNA processing protein RimM                             | 484 |            |       |       |       |            |       |       |       | <b>2</b>   | 0.023 | 3281  | 2123  |
| EF1904 conserved domain protein                                     | 502 |            |       |       |       | <b>3</b>   | 0.026 | 3118  | 1569  |            |       |       |       |
| EF1907 maoC like domain protein                                     | 418 |            |       |       |       |            |       |       |       | <b>3</b>   | 0.029 | 17945 | 9050  |
| EF1916 P-binding protein                                            | 502 | <b>2</b>   | 0.007 | 12288 | 6395  |            |       |       |       |            |       |       |       |
| EF1917 P-dependent Clp protease, P-binding subunit Clp              | 507 |            |       |       |       | <b>2</b>   | 0.026 | 20607 | 11446 |            |       |       |       |
| EF1919 acetyltransferase, GN family                                 | 472 |            |       |       |       | <b>3</b>   | 0.043 | 6838  | 3538  |            |       |       |       |
| EF1921 inosine-uridine preferring nucleoside hydrolase              | 502 |            |       |       |       | <b>3</b>   | 0.022 | 30818 | 18386 | <b>5</b>   | 0.037 | 34890 | 14010 |
| EF1927 glycerol uptake facilitator protein, putative                | 497 |            |       |       |       | <b>-3</b>  | 0.011 | 34100 | 53520 | <b>-5</b>  | 0.015 | 22875 | 48396 |
| EF1928 aerobic glycerol-3-phosphate dehydrogenase, putative         | 488 |            |       |       |       | <b>-2</b>  | 0.006 | 41108 | 53576 |            |       |       |       |
| EF1929 glycerol kinase                                              | 499 |            |       |       |       | <b>-4</b>  | 0.002 | 27330 | 54470 | <b>-5</b>  | 0.027 | 15003 | 37630 |
| EF1937 conserved hypothetical protein                               | 454 | <b>3</b>   | 0.039 | 3286  | 1774  |            |       |       |       |            |       |       |       |
| EF1938 calcium E1-E2-type Pase                                      | 498 | <b>3</b>   | 0.006 | 9686  | 4646  |            |       |       |       |            |       |       |       |
| EF1973 conserved hypothetical protein TIGR00256                     | 402 |            |       |       |       | <b>3</b>   | 0.029 | 3695  | 1649  |            |       |       |       |
| EF1978 DNA-3-methyladenine glycosylase                              | 459 |            |       |       |       | <b>-2</b>  | 0.033 | 2569  | 2887  |            |       |       |       |
| EF1981 hypothetical protein                                         | 220 |            |       |       |       |            |       |       |       | <b>2</b>   | 0.013 | 3547  | 2583  |
| EF2023 hypothetical protein                                         | 258 |            |       |       |       | <b>-3</b>  | 0.006 | 2114  | 2550  |            |       |       |       |
| EF2048 conserved hypothetical protein TIGR00048                     | 501 | <b>-2</b>  | 0.046 | 9068  | 12418 |            |       |       |       |            |       |       |       |
| <b>EF2057 polyprenyl synthetase</b>                                 | 486 | <b>2</b>   | 0.007 | 14173 | 9522  |            |       |       |       |            |       |       |       |
| <b>EF2058 transport P-binding protein CydC, putative</b>            | 496 | <b>3</b>   | 0.000 | 15052 | 7297  | <b>7</b>   | 0.000 | 19148 | 4714  |            |       |       |       |
| <b>EF2059 transport P-binding protein CydD, putative</b>            | 498 | <b>3</b>   | 0.003 | 28177 | 17808 | <b>6</b>   | 0.000 | 18670 | 6319  | <b>5</b>   | 0.003 | 12908 | 3970  |
| EF2063 transcriptional activator, AraC family                       | 502 |            |       |       |       |            |       |       |       | <b>2</b>   | 0.036 | 3495  | 2104  |
| EF2070 tRNA (5-methylaminomethyl-2-thiouridylate)-methyltransferase | 493 |            |       |       |       |            |       |       |       | <b>2</b>   | 0.042 | 2353  | 1642  |
| <b>EF2075 iron (chelated) ABC transporter, permease protein</b>     | 501 |            |       |       |       | <b>4</b>   | 0.033 | 16799 | 7416  | <b>3</b>   | 0.011 | 9671  | 4874  |
| <b>EF2076 endocarditis specific antigen</b>                         | 488 |            |       |       |       | <b>7</b>   | 0.035 | 27860 | 12840 | <b>8</b>   | 0.020 | 20585 | 5794  |
| <b>EF2077 ABC transporter, P-binding protein</b>                    | 494 |            |       |       |       | <b>3</b>   | 0.005 | 3807  | 1566  |            |       |       |       |
| <b>EF2163 glycerophosphoryl diester phosphodiesterase</b>           | 500 | <b>2</b>   | 0.047 | 5805  | 3762  |            |       |       |       |            |       |       |       |
| <b>EF2165 NAD-dependent epimerase/dehydratase family</b>            | 495 | <b>2</b>   | 0.014 | 9545  | 5956  |            |       |       |       |            |       |       |       |
| EF2177 capsular polysaccharide biosynthesis glycosyltransferase     | 492 |            |       |       |       | <b>5</b>   | 0.033 | 2789  | 1205  |            |       |       |       |
| EF2178 hypothetical protein                                         | 497 |            |       |       |       | <b>6</b>   | 0.040 | 3387  | 1574  |            |       |       |       |
| EF2179 hypothetical protein                                         | 497 |            |       |       |       | <b>3</b>   | 0.011 | 4384  | 2182  |            |       |       |       |
| EF2180 glycosyl transferase domain protein                          | 503 |            |       |       |       | <b>2</b>   | 0.028 | 7941  | 4733  |            |       |       |       |
| EF2190 glycosyl transferase domain protein                          | 494 | <b>2</b>   | 0.001 | 8010  | 4869  | <b>4</b>   | 0.007 | 3079  | 955   |            |       |       |       |
| EF2191 dTDP-4-dehydrorhamnose reductase                             | 498 |            |       |       |       | <b>6</b>   | 0.003 | 9093  | 2594  |            |       |       |       |
| EF2192 dTDP-glucose 4,6-dehydratase                                 | 503 |            |       |       |       | <b>3</b>   | 0.003 | 25764 | 11666 |            |       |       |       |
| EF2193 dTDP-4-dehydrorhamnose 3,5-epimerase                         | 498 |            |       |       |       | <b>3</b>   | 0.016 | 15086 | 7092  |            |       |       |       |
| EF2194 glucose-1-phosphate thymidyltransferase                      | 496 |            |       |       |       | <b>2</b>   | 0.023 | 5954  | 3309  |            |       |       |       |
| EF2195 glycosyl transferase domain protein                          | 502 | <b>2</b>   | 0.011 | 14303 | 8927  |            |       |       |       |            |       |       |       |
| EF2197 glycosyl transferase domain protein                          | 509 | <b>2</b>   | 0.006 | 13385 | 8190  |            |       |       |       |            |       |       |       |
| EF2204 aminopeptidase pep, authentic frameshift                     | 500 |            |       |       |       | <b>2</b>   | 0.022 | 9941  | 5697  |            |       |       |       |
| EF2205 conserved hypothetical protein                               | 358 |            |       |       |       | <b>2</b>   | 0.021 | 2169  | 1311  |            |       |       |       |
| EF2217 alpha-1,2-mannosidase, putative                              | 494 |            |       |       |       | <b>-6</b>  | 0.015 | 9091  | 24639 |            |       |       |       |
| EF2218 DNA-binding response regulator                               | 493 |            |       |       |       | <b>2</b>   | 0.025 | 12952 | 6134  |            |       |       |       |
| EF2254 hypothetical protein                                         | 491 |            |       |       |       |            |       |       |       | <b>-2</b>  | 0.027 | 1918  | 4297  |
| EF2314 bacteriocin, putative                                        | 507 |            |       |       |       |            |       |       |       | <b>-2</b>  | 0.009 | 2075  | 3076  |
| EF2355 P-dependent Clp protease, P-binding subunit Clp              | 493 |            |       |       |       |            |       |       |       | <b>2</b>   | 0.041 | 22400 | 15461 |
| EF2365 xanthine phosphoribosyltransferase                           | 484 | <b>2</b>   | 0.049 | 16283 | 9947  |            |       |       |       |            |       |       |       |
| EF2372 aspartate aminotransferase                                   | 498 |            |       |       |       | <b>-2</b>  | 0.027 | 9210  | 13356 |            |       |       |       |
| EF2377 amino acid permease                                          | 501 | <b>2</b>   | 0.041 | 11225 | 7197  |            |       |       |       |            |       |       |       |
| <b>EF2378 DNA polymerase III, alpha subunit, Gram-positive</b>      | 499 |            |       |       |       | <b>3</b>   | 0.005 | 4650  | 2036  |            |       |       |       |
| EF2408 hypothetical protein                                         | 56  | <b>-2</b>  | 0.000 | 10256 | 13344 |            |       |       |       |            |       |       |       |
| EF2417 ferric uptake regulator family protein                       | 416 |            |       |       |       | <b>2</b>   | 0.049 | 4306  | 2446  |            |       |       |       |
| EF2424 pyrroline-5-carboxylate reductase, putative                  | 506 |            |       |       |       | <b>2</b>   | 0.047 | 3936  | 1994  |            |       |       |       |
| EF2426 transcriptional regulator, GntR family                       | 497 |            |       |       |       | <b>2</b>   | 0.013 | 3312  | 1722  |            |       |       |       |
| EF2433 phosphoglycerate mutase family protein                       | 500 |            |       |       |       |            |       |       |       | <b>-2</b>  | 0.018 | 1480  | 2519  |
| EF2444 acyl-CoA thioesterase, putative                              | 475 | <b>2</b>   | 0.018 | 10838 | 6228  | <b>3</b>   | 0.043 | 3385  | 1923  |            |       |       |       |
| EF2450 PDZ domain protein                                           | 507 |            |       |       |       | <b>2</b>   | 0.000 | 11945 | 5756  | <b>3</b>   | 0.025 | 9860  | 4763  |
| EF2451 lipopolysaccharide core biosynthesis protein Kds             | 478 |            |       |       |       | <b>3</b>   | 0.014 | 7361  | 3634  | <b>3</b>   | 0.009 | 3898  | 2180  |
| EF2453 conserved hypothetical protein                               | 262 |            |       |       |       | <b>2</b>   | 0.038 | 5870  | 3439  |            |       |       |       |
| EF2478 conserved hypothetical protein                               | 500 |            |       |       |       | <b>3</b>   | 0.015 | 4869  | 2457  |            |       |       |       |
| EF2479 conserved hypothetical protein                               | 484 |            |       |       |       | <b>3</b>   | 0.025 | 16125 | 7891  | <b>3</b>   | 0.006 | 7843  | 4135  |
| EF2496 lipoprotein, YaeC family                                     | 508 |            |       |       |       |            |       |       |       | <b>2</b>   | 0.026 | 12228 | 7654  |
| EF2509 azlC protein, putative                                       | 500 | <b>2</b>   | 0.028 | 8401  | 6024  |            |       |       |       |            |       |       |       |
| EF2552 Sua5/YciO/YrdC/YwC family protein, putative                  | 504 |            |       |       |       | <b>3</b>   | 0.008 | 11514 | 5129  | <b>3</b>   | 0.029 | 8412  | 3752  |

|        |                                                     |     |    |       |       |       |    |       |       |       |  |    |       |       |       |
|--------|-----------------------------------------------------|-----|----|-------|-------|-------|----|-------|-------|-------|--|----|-------|-------|-------|
| EF2590 | conserved hypothetical protein                      | 502 | 2  | 0.000 | 10474 | 5762  |    |       |       |       |  |    |       |       |       |
| EF2597 | glycosyl hydrolase, family 1                        | 509 |    |       |       |       |    |       |       |       |  | -5 | 0.014 | 2927  | 9406  |
| EF2603 | PTS system component                                | 320 |    |       |       |       | 2  | 0.022 | 14818 | 9109  |  |    |       |       |       |
| EF2607 | P synthase F1, epsilon subunit                      | 356 |    |       |       |       | 2  | 0.003 | 27837 | 16718 |  |    |       |       |       |
| EF2610 | P synthase F1, alpha subunit                        | 497 |    |       |       |       | 2  | 0.013 | 22034 | 14960 |  |    |       |       |       |
| EF2616 | SsrA-binding protein                                | 444 |    |       |       |       | 2  | 0.008 | 5807  | 3252  |  |    |       |       |       |
| EF2618 | carboxylesterase precursor, putative                | 495 |    |       |       |       |    |       |       |       |  | 2  | 0.017 | 14378 | 7272  |
| EF2620 | preprotein translocase, SecE subunit                | 171 |    |       |       |       | 2  | 0.013 | 4475  | 2206  |  |    |       |       |       |
| EF2621 | conserved hypothetical protein                      | 180 |    |       |       |       | 3  | 0.035 | 6755  | 2927  |  |    |       |       |       |
| EF2643 | hypothetical protein                                | 490 |    |       |       |       |    |       |       |       |  | 3  | 0.013 | 4032  | 1737  |
| EF2646 | conserved hypothetical protein TIGR00045            | 501 |    |       |       |       | 3  | 0.004 | 5428  | 2387  |  |    |       |       |       |
| EF2654 | alcohol dehydrogenase, zinc-containing              | 500 |    |       |       |       | -2 | 0.028 | 5912  | 7489  |  |    |       |       |       |
| EF2659 | conserved hypothetical protein                      | 454 |    |       |       |       | 2  | 0.048 | 2013  | 1167  |  |    |       |       |       |
| EF2665 | RNA methyltransferase, TrmH family                  | 441 |    |       |       |       | 2  | 0.019 | 3114  | 1623  |  |    |       |       |       |
| EF2672 | conserved hypothetical protein                      | 497 |    |       |       |       |    |       |       |       |  | -3 | 0.007 | 4234  | 8053  |
| EF2678 | arsenate reductase, putative                        | 366 |    |       |       |       | 3  | 0.049 | 33587 | 19729 |  |    |       |       |       |
| EF2689 | exonuclease SbcC                                    | 501 |    |       |       |       | 2  | 0.000 | 16561 | 10281 |  |    |       |       |       |
| EF2698 | tellurite resistance protein                        | 498 |    |       |       |       | 2  | 0.032 | 29298 | 23775 |  |    |       |       |       |
| EF2703 | transcriptional regulator                           | 498 | -2 | 0.031 | 3420  | 4347  |    |       |       |       |  |    |       |       |       |
| EF2711 | transcriptional regulator, AraC family              | 481 |    |       |       |       | -2 | 0.044 | 2106  | 3289  |  | -3 | 0.016 | 1904  | 4303  |
| EF2719 | ribosomal protein L11                               | 358 |    |       |       |       |    |       |       |       |  | 2  | 0.007 | 21870 | 13367 |
| EF2720 | ABC transporter, P-binding protein                  | 504 |    |       |       |       | 3  | 0.030 | 32309 | 19618 |  |    |       |       |       |
| EF2737 | hypothetical protein                                | 192 | 3  | 0.022 | 6409  | 3349  |    |       |       |       |  |    |       |       |       |
| EF2743 | conserved hypothetical protein                      | 500 |    |       |       |       | 2  | 0.032 | 5287  | 3275  |  |    |       |       |       |
| EF2744 | endoglucanase, putative                             | 492 |    |       |       |       |    |       |       |       |  | 2  | 0.016 | 5851  | 2933  |
| EF2746 | dltD protein                                        | 507 |    |       |       |       | 2  | 0.013 | 2946  | 1456  |  |    |       |       |       |
| EF2747 | D-alanyl carrier protein                            | 157 |    |       |       |       | 2  | 0.010 | 1887  | 886   |  |    |       |       |       |
| EF2748 | dltB protein                                        | 492 |    |       |       |       | 3  | 0.002 | 4568  | 2130  |  |    |       |       |       |
| EF2749 | D-alanine-activating enzyme, putative               | 505 |    |       |       |       | 4  | 0.004 | 8118  | 2998  |  |    |       |       |       |
| EF2751 | hypothetical protein                                | 502 |    |       |       |       | 3  | 0.007 | 9432  | 4232  |  |    |       |       |       |
| EF2752 | ABC transporter, P-binding protein                  | 501 |    |       |       |       | 2  | 0.029 | 7700  | 4316  |  |    |       |       |       |
| EF2757 | conserved hypothetical protein TIGR00245            | 500 | 2  | 0.030 | 8554  | 4798  | 3  | 0.028 | 2539  | 1251  |  |    |       |       |       |
| EF2760 | conserved hypothetical protein                      | 336 |    |       |       |       | 2  | 0.017 | 19015 | 10752 |  |    |       |       |       |
| EF2761 | conserved hypothetical protein                      | 507 |    |       |       |       | 2  | 0.007 | 24405 | 15639 |  | 2  | 0.011 | 15049 | 8994  |
| EF2762 | DNA polymerase III, delta prime subunit, putative   | 497 |    |       |       |       | 4  | 0.013 | 22753 | 9590  |  | 4  | 0.020 | 15928 | 6533  |
| EF2763 | conserved hypothetical protein                      | 245 |    |       |       |       |    |       |       |       |  | 2  | 0.029 | 10345 | 6826  |
| EF2767 | transcriptional regulator                           | 505 | 2  | 0.007 | 4333  | 2500  | 3  | 0.004 | 3155  | 1526  |  |    |       |       |       |
| EF2768 | conserved hypothetical protein                      | 514 | 2  | 0.012 | 4031  | 2778  | 3  | 0.034 | 2435  | 1192  |  |    |       |       |       |
| EF2769 | ABC transporter, P-binding protein                  | 499 | 3  | 0.001 | 3843  | 2354  | 3  | 0.006 | 2668  | 1349  |  | 2  |       |       |       |
| EF2770 | conserved hypothetical protein                      | 494 | 2  | 0.010 | 3093  | 2168  |    |       |       |       |  |    |       |       |       |
| EF2772 | drug transporter, putative, authentic frameshift    | 502 | 2  | 0.001 | 2449  | 1473  |    |       |       |       |  |    |       |       |       |
| EF2775 | phosphomethylpyrimidine kinase                      | 501 | 2  | 0.003 | 3317  | 2067  |    |       |       |       |  |    |       |       |       |
| EF2776 | thiamine-phosphate pyrophosphorylase                | 500 | 2  | 0.003 | 3262  | 2301  |    |       |       |       |  |    |       |       |       |
| EF2777 | hydroxyethylthiazole kinase                         | 500 | 2  | 0.006 | 2436  | 1801  |    |       |       |       |  |    |       |       |       |
| EF2780 | conserved hypothetical protein TIGR00103            | 293 |    |       |       |       |    |       |       |       |  | 2  | 0.024 | 2998  | 2053  |
| EF2781 | DNA polymerase III, gamma and tau subunits          | 500 |    |       |       |       |    |       |       |       |  | 2  | 0.033 | 27152 | 16519 |
| EF2790 | rhomboid family protein                             | 487 |    |       |       |       | 2  | 0.049 | 5498  | 2982  |  |    |       |       |       |
| EF2795 | LysM domain protein                                 | 500 |    |       |       |       | 3  | 0.012 | 4178  | 1935  |  | 3  | 0.034 | 3427  | 1666  |
| EF2860 | hypothetical protein                                | 497 |    |       |       |       |    |       |       |       |  | 4  | 0.003 | 5446  | 2218  |
| EF2867 | conserved hypothetical protein                      | 499 | 2  | 0.010 | 17841 | 10017 | 2  | 0.046 | 7544  | 4448  |  | 2  | 0.002 | 6143  | 3680  |
| EF2870 | conserved hypothetical protein TIGR00488            | 471 |    |       |       |       |    |       |       |       |  | 2  | 0.011 | 16059 | 10282 |
| EF2871 | conserved hypothetical protein TIGR00482            | 507 | 2  | 0.005 | 28685 | 19910 | 2  | 0.016 | 7578  | 4132  |  | 2  | 0.014 | 6052  | 3426  |
| EF2872 | conserved hypothetical protein TIGR00253            | 276 |    |       |       |       | 2  | 0.005 | 3979  | 1954  |  | 2  | 0.041 | 2982  | 1768  |
| EF2873 | Pase of unknown function subfamily, putative        | 496 |    |       |       |       | 2  | 0.030 | 4818  | 2619  |  | 3  | 0.039 | 4544  | 2754  |
| EF2874 | conserved hypothetical protein                      | 495 |    |       |       |       | 2  | 0.028 | 2240  | 1212  |  | 4  | 0.035 | 2474  | 1227  |
| EF2876 | acetyl-CoA carboxylase, carboxyl transferase be     | 513 |    |       |       |       | 3  | 0.032 | 23251 | 10638 |  |    |       |       |       |
| EF2877 | acetyl-CoA carboxylase, biotin carboxylase          | 493 |    |       |       |       | 3  | 0.028 | 25135 | 11508 |  |    |       |       |       |
| EF2878 | (3R)-hydroxymyristoyl-(acyl-carrier-protein) dehy   | 373 |    |       |       |       | 4  | 0.016 | 23577 | 9821  |  | 2  | 0.049 | 16360 | 9713  |
| EF2879 | acetyl-CoA carboxylase, biotin carboxyl carrier p   | 401 |    |       |       |       | 5  | 0.033 | 24340 | 9213  |  | 3  | 0.023 | 14537 | 7403  |
| EF2880 | 3-oxoacyl-(acyl-carrier-protein) synthase II        | 502 |    |       |       |       | 4  | 0.027 | 27778 | 10735 |  | 3  | 0.007 | 21491 | 11500 |
| EF2881 | 3-oxoacyl-(acyl-carrier-protein) reductase          | 496 |    |       |       |       | 3  | 0.021 | 20986 | 9427  |  | 2  | 0.019 | 20205 | 10268 |
| EF2882 | malonyl CoA-acyl carrier protein transacylase       | 503 |    |       |       |       |    |       |       |       |  | 2  | 0.016 | 11848 | 6740  |
| EF2898 | peptidyl-prolyl cis-trans isomerase, cyclophilin-ty | 499 |    |       |       |       |    |       |       |       |  | 2  | 0.011 | 2923  | 1669  |
| EF2904 | conserved hypothetical protein                      | 501 |    |       |       |       |    |       |       |       |  | -2 | 0.034 | 2410  | 3745  |
| EF2905 | sugar ABC transporter, permease protein             | 491 |    |       |       |       | -2 | 0.018 | 3854  | 4041  |  |    |       |       |       |
| EF2907 | sugar ABC transporter, P-binding protein            | 500 |    |       |       |       | -2 | 0.049 | 4003  | 4775  |  |    |       |       |       |
| EF2911 | DNA-binding response regulator                      | 500 |    |       |       |       | 2  | 0.017 | 8809  | 4473  |  | 2  | 0.042 | 6022  | 2851  |
| EF2915 | conserved hypothetical protein TIGR00247            | 497 |    |       |       |       | 4  | 0.005 | 10800 | 4080  |  | 4  | 0.036 | 7075  | 2918  |

|               |                                                  |     |   |       |       |       |       |       |       |    |       |       |       |    |       |       |       |
|---------------|--------------------------------------------------|-----|---|-------|-------|-------|-------|-------|-------|----|-------|-------|-------|----|-------|-------|-------|
| EF2916        | hydrolase, haloacid dehalogenase-like family     | 497 |   |       |       | 4     | 0.009 | 3583  | 1161  |    |       |       |       |    |       |       |       |
| EF2917        | UDP-N-acetylglucosamine 2-epimerase              | 500 |   |       |       | 2     | 0.011 | 9890  | 4992  | 2  | 0.005 | 6236  | 3332  |    |       |       |       |
| EF2918        | ferrityochelin binding protein                   | 461 |   |       |       | 2     | 0.024 | 18361 | 9889  | 2  | 0.032 | 12121 | 5805  |    |       |       |       |
| EF2919        | ABC transporter, P-binding/permease protein      | 503 |   |       |       |       |       |       |       | 3  | 0.010 | 4460  | 1991  |    |       |       |       |
| EF2920        | ABC transporter, P-binding/permease protein      | 505 |   |       |       | 2     | 0.040 | 5145  | 2896  |    |       |       |       |    |       |       |       |
| EF2924        | conserved hypothetical protein                   | 500 |   |       |       | 3     | 0.003 | 8451  | 3532  |    |       |       |       |    |       |       |       |
| EF2959        | transporter, putative                            | 502 |   |       |       | 2     | 0.010 | 27895 | 16458 |    |       |       |       |    |       |       |       |
| EF2960        | ribose ABC transporter protein                   | 333 |   |       |       |       |       |       |       | 2  | 0.044 | 34872 | 19454 |    |       |       |       |
| EF2961        | ribokinase                                       | 500 |   |       |       | 2     | 0.013 | 37729 | 26407 | 3  | 0.040 | 33416 | 17622 |    |       |       |       |
| EF2964        | SgaT protein, putative                           | 496 |   |       |       | -2    | 0.000 | 26736 | 37884 |    |       |       |       |    |       |       |       |
| EF2965        | conserved hypothetical protein                   | 228 |   |       |       | -3    | 0.004 | 24246 | 36387 |    |       |       |       |    |       |       |       |
| EF2966        | PTS system component                             | 504 |   |       |       | -2    | 0.001 | 22659 | 31134 |    |       |       |       |    |       |       |       |
| EF2972        | amidinotransferase family protein                | 498 |   |       |       | 4     | 0.003 | 19571 | 7766  | 3  | 0.017 | 15778 | 7804  |    |       |       |       |
| EF2973        | alkaline phosphatase                             | 501 | 3 | 0.004 | 6194  | 3345  |       |       |       |    |       |       |       |    |       |       |       |
| EF2974        | MutS2 family protein                             | 495 | 3 | 0.004 | 4019  | 2203  |       |       |       | 2  | 0.012 | 2257  | 1145  | 3  | 0.020 | 2023  | 1045  |
| EF3003        | hypothetical protein                             | 475 |   |       |       |       |       |       |       | 2  | 0.034 | 6044  | 3231  |    |       |       |       |
| EF3005        | choloylglycine hydrolase family protein          | 491 |   |       |       | -2    | 0.038 | 4015  | 6824  | -2 | 0.026 | 3291  | 5683  |    |       |       |       |
| EF3018        | conserved domain protein                         | 500 |   |       |       | 4     | 0.038 | 2011  | 1053  |    |       |       |       |    |       |       |       |
| EF3019        | hypothetical protein                             | 492 | 3 | 0.002 | 2573  | 1542  |       |       |       |    |       |       |       |    |       |       |       |
| EF3028        | tRNA binding domain protein                      | 496 |   |       |       | 2     | 0.013 | 13783 | 7537  |    |       |       |       |    |       |       |       |
| EF3066        | polypeptide deformylase                          | 494 |   |       |       | 2     | 0.034 | 4947  | 3012  |    |       |       |       |    |       |       |       |
| EF3091        | YitT family protein                              | 490 | 2 | 0.015 | 8271  | 4911  |       |       |       |    |       |       |       |    |       |       |       |
| EF3092        | glyoxalase family protein                        | 368 | 2 | 0.000 | 11167 | 6083  |       |       |       |    |       |       |       |    |       |       |       |
| EF3093        | conserved hypothetical protein                   | 445 | 3 | 0.027 | 13229 | 6688  |       |       |       |    |       |       |       | 3  | 0.043 | 2091  | 930   |
| <b>EF3094</b> | <b>cell division protein FtsY</b>                | 499 |   |       |       |       |       |       |       | 2  | 0.004 | 10462 | 6198  |    |       |       |       |
| EF3109        | peptide ABC transporter, P-binding protein       | 500 | 2 | 0.012 | 16865 | 10815 |       |       |       |    |       |       |       |    |       |       |       |
| EF3113        | P-dependent DNA helicase RecG                    | 499 | 4 | 0.009 | 7003  | 2835  |       |       |       | 2  | 0.024 | 6396  | 3156  |    |       |       |       |
| EF3121        | protein phosphatase 2C                           | 493 |   |       |       |       |       |       |       |    |       |       |       | 2  | 0.024 | 4632  | 2790  |
| EF3122        | Sun protein                                      | 502 |   |       |       |       |       |       |       | 2  | 0.025 | 5358  | 3149  |    |       |       |       |
| EF3134        | 2-dehydro-3-deoxyphosphogluconate aldolase/4-l   | 523 |   |       |       |       |       |       |       | 2  | 0.019 | 26379 | 15442 | 2  | 0.015 | 25301 | 14775 |
| EF3135        | mannonate dehydratase                            | 499 |   |       |       |       |       |       |       | 2  | 0.021 | 23220 | 15034 | 2  | 0.006 | 19343 | 11109 |
| EF3136        | PTS system component                             | 412 |   |       |       |       |       |       |       |    |       |       |       | 2  | 0.035 | 26991 | 16999 |
| EF3165        | maf protein                                      | 475 |   |       |       |       |       |       |       | 2  | 0.024 | 13680 | 7570  |    |       |       |       |
| EF3166        | DNA mismatch repair protein MutL                 | 496 |   |       |       |       |       |       |       | 2  | 0.008 | 15805 | 8192  |    |       |       |       |
| EF3167        | DNA mismatch repair protein MutS                 | 507 |   |       |       |       |       |       |       | 2  | 0.008 | 10428 | 5026  | 2  | 0.008 | 7409  | 4008  |
| EF3168        | conserved hypothetical protein                   | 350 |   |       |       |       |       |       |       | 2  | 0.026 | 2060  | 1094  | 2  | 0.013 | 2380  | 1534  |
| EF3173        | conserved hypothetical protein                   | 508 |   |       |       |       |       |       |       |    |       |       |       | 2  | 0.018 | 4163  | 2446  |
| EF3196        | response regulator                               | 517 |   |       |       |       |       |       |       | 2  | 0.005 | 29350 | 17896 |    |       |       |       |
| EF3197        | F domain protein                                 | 495 |   |       |       |       |       |       |       | 2  | 0.006 | 28318 | 16835 |    |       |       |       |
| EF3198        | lipoprotein, YaeC family                         | 492 |   |       |       |       |       |       |       | 3  | 0.019 | 9300  | 4418  | 2  | 0.025 | 3616  | 2083  |
| EF3199        | ABC transporter, permease protein                | 502 |   |       |       |       |       |       |       |    |       |       |       | 2  | 0.042 | 9085  | 4159  |
| EF3200        | ABC transporter, P-binding protein               | 505 |   |       |       |       |       |       |       | 2  | 0.013 | 18539 | 9529  |    |       |       |       |
| <b>EF3210</b> | <b>PTS system component</b>                      | 352 |   |       |       |       |       |       |       | 7  | 0.001 | 8473  | 2116  | 3  | 0.027 | 3124  | 1227  |
| <b>EF3211</b> | <b>PTS system component</b>                      | 424 |   |       |       |       |       |       |       | 8  | 0.004 | 14467 | 3089  | 9  | 0.002 | 12295 | 2549  |
| <b>EF3212</b> | <b>PTS system component</b>                      | 496 |   |       |       |       |       |       |       | 6  | 0.001 | 18159 | 5022  | 5  | 0.009 | 9524  | 2378  |
| <b>EF3213</b> | <b>PTS system component</b>                      | 499 |   |       |       |       |       |       |       | 5  | 0.000 | 21235 | 6059  | 4  | 0.010 | 16792 | 5452  |
| EF3214        | sigma-54 dependent transcriptional regulator, pu | 507 |   |       |       |       |       |       |       | 4  | 0.003 | 7627  | 2620  |    |       |       |       |
| EF3216        | transcriptional regulator, putative              | 500 |   |       |       |       |       |       |       | 3  | 0.016 | 2504  | 1123  |    |       |       |       |
| EF3234        | hypothetical protein                             | 504 |   |       |       |       |       |       |       |    |       |       |       | 2  | 0.006 | 2902  | 1739  |
| EF3236        | leader peptidase PilD, putative                  | 501 |   |       |       |       |       |       |       | 2  | 0.033 | 3383  | 1870  |    |       |       |       |
| EF3237        | DNA-directed RNA polymerase, beta-prime subu     | 505 |   |       |       |       |       |       |       | 3  | 0.000 | 17726 | 7611  |    |       |       |       |
| EF3239        | conserved hypothetical protein                   | 145 |   |       |       |       |       |       |       | 2  | 0.014 | 2589  | 1563  |    |       |       |       |
| EF3245        | cell-envelope associated acid phosphatase        | 501 | 2 | 0.018 | 3285  | 2306  |       |       |       |    |       |       |       |    |       |       |       |
| EF3256        | lipoprotein, putative                            | 495 |   |       |       |       |       |       |       | -3 | 0.008 | 11665 | 21331 |    |       |       |       |
| EF3265        | dihydropteroate synthase                         | 501 |   |       |       |       |       |       |       | 2  | 0.041 | 10854 | 5721  | 3  | 0.017 | 10025 | 4043  |
| EF3294        | conserved hypothetical protein                   | 499 |   |       |       |       |       |       |       | 3  | 0.006 | 2681  | 1160  |    |       |       |       |
| EF3296        | conserved hypothetical protein TIGR00092         | 506 |   |       |       |       |       |       |       | 2  | 0.012 | 16685 | 9572  |    |       |       |       |
| EF3298        | chromosome partitioning protein ParB, putative   | 501 |   |       |       |       |       |       |       | 2  | 0.037 | 8055  | 4599  |    |       |       |       |
| EF3305        | PTS system component                             | 293 |   |       |       |       |       |       |       | -3 | 0.040 | 12976 | 30323 |    |       |       |       |
| EF3306        | PTS system component                             | 499 |   |       |       |       |       |       |       | -3 | 0.032 | 12053 | 24237 |    |       |       |       |
| EF3307        | PTS system component                             | 428 |   |       |       |       |       |       |       | -3 | 0.017 | 12511 | 23676 |    |       |       |       |
| EF3308        | transcriptional activator                        | 420 |   |       |       |       |       |       |       | -2 | 0.016 | 17977 | 24944 |    |       |       |       |
| EF3309        | transcriptional antiterminator, BglG family      | 497 |   |       |       |       |       |       |       | -3 | 0.015 | 13952 | 24273 |    |       |       |       |
| EF3311        | Glucose inhibited division protein A             | 500 | 2 | 0.004 | 16153 | 10797 |       |       |       | 2  | 0.001 | 3964  | 2115  | 3  | 0.007 | 2329  | 1265  |
| EF3319        | citrate lyase, alpha subunit                     | 501 |   |       |       |       |       |       |       | -2 | 0.043 | 14321 | 20503 |    |       |       |       |
| EF3327        | citrate transporter                              | 502 |   |       |       |       |       |       |       |    |       |       |       | -4 | 0.048 | 1002  | 3282  |
